# Supplementary material for: Myeloid apolipoprotein E controls dendritic cell antigen presentation and T cell activation
Source: PubMed Central journal article supplement (PMC6079066; doi:10.1038/s41467-018-05322-1), 2018-08-06
Supplement: 41467_2018_5322_MOESM1_ESM.pdf [file 41467_2018_5322_MOESM1_ESM.pdf]

# Myeloid apolipoprotein E controls dendritic cell antigen presentation and T cell activation

Bonacina et al.

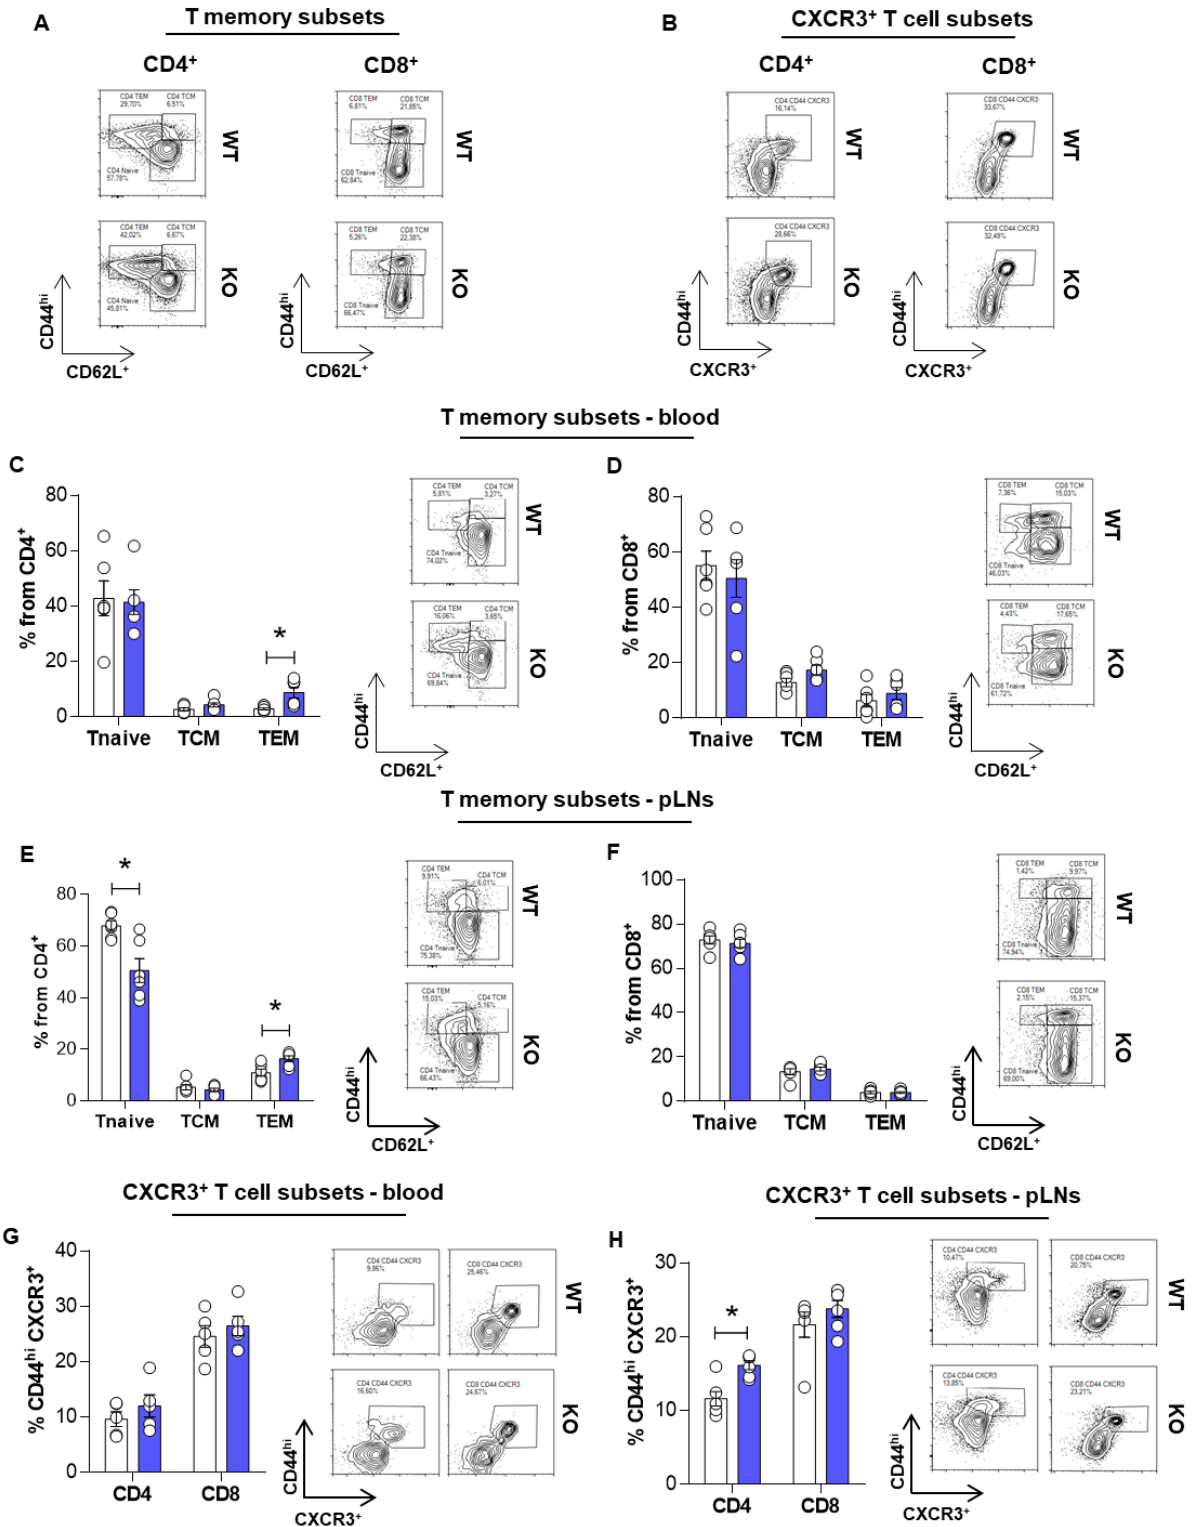

Supplementary Figure 1. Immunophenotyping of WT and apoE KO mice

A-B) Representative density plots of CD4<sup>+</sup> and CD8<sup>+</sup> T memory subsets (A) and activated CD44<sup>hi</sup> CXCR3<sup>+</sup> (B) from the spleen of WT or apoE KO mice. C-D) Frequencies of CD4<sup>+</sup> (C) and CD8<sup>+</sup> (D) T

memory subsets in the blood of WT or apoE KO mice; representative pictures are shown. **E-F)** Frequencies of CD4<sup>+</sup> (E) and CD8<sup>+</sup> (F) T memory subsets in the peripheral lymph nodes of WT and apoE KO mice; representative pictures are shown. **G-H)** Frequencies of CD4<sup>+</sup> and CD8<sup>+</sup> activated CD44<sup>hi</sup> CXCR3<sup>+</sup> T cells in the blood (G) and peripheral lymph nodes (H) from WT and apoE KO mice. n=4-6 per group. Statistical analysis was performed with two-way Anova. Data are reported as mean ± SEM; \*p<0.05.

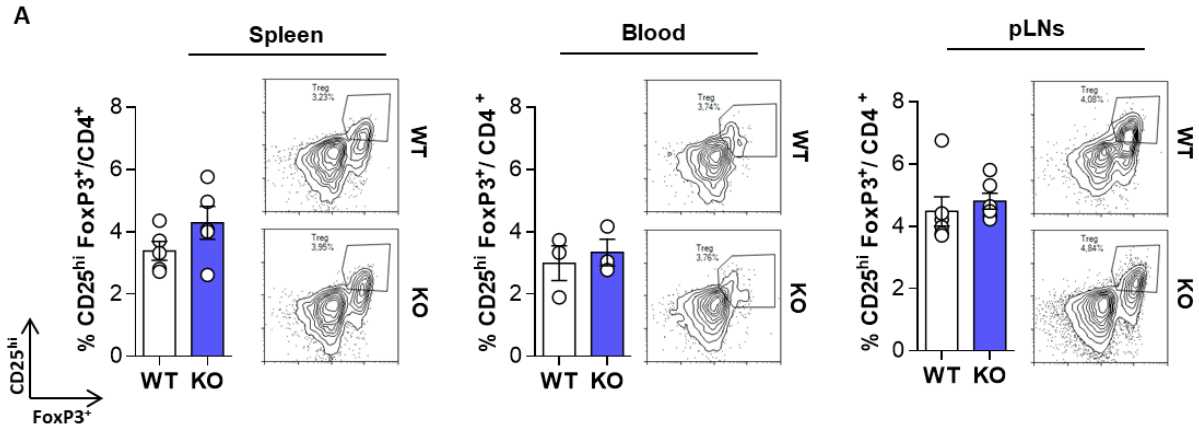

Supplementary Figure 2. ApoE KO mice show no difference in Treg frequency compared to WT mice

A) Frequency of Treg cells ( $CD4^+ CD25^{hi} FoxP3^+$ ) in the spleen, blood and peripheral lymph nodes of WT and apoE KO mice; representative dot plots are presented.  $n=3-6$  per group. Statistical analysis was performed with unpaired Ttest. Data are reported as mean  $\pm$  SEM.

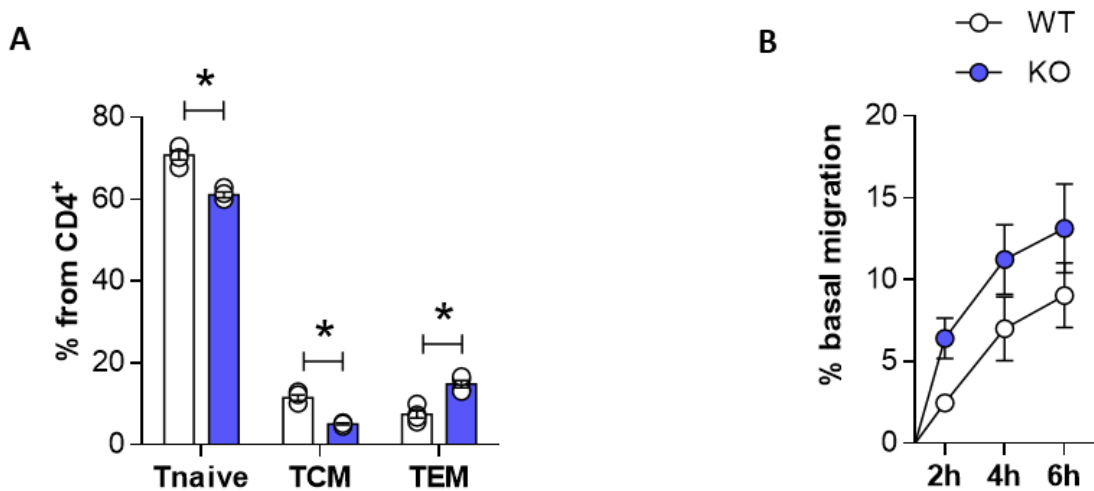

Supplementary Figure 3. Graft rejection is associated with the expansion of CD4<sup>+</sup> TEM in apoE KO mice

**A)** Frequency of CD4<sup>+</sup> T cells subsets in the draining lymph nodes of WT and apoE KO mice after skin allograft transplantation. **B)** Basal migratory response of lymphocytes isolated from draining lymph nodes after allograft rejection measured by transwell. n=4 per group. Statistical analysis was performed with two-way Anova. Data are reported as mean ± SEM; \*p<0.05.

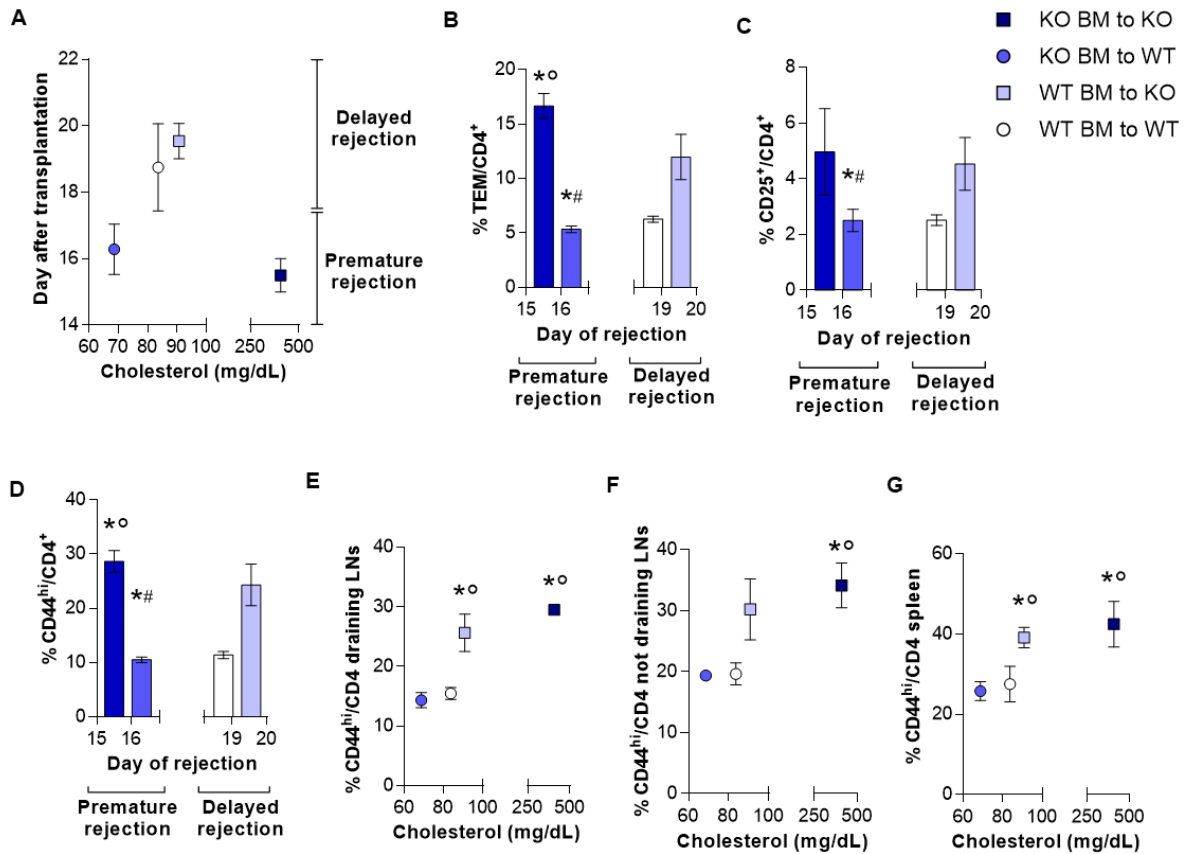

#### Supplementary Figure 4. Characterization of bone marrow transplanted WT and apoE KO mice

**A)** Plasma cholesterol levels (mg/dL) after allograft rejection presented compared to the mean of day rejection. **B-D)** Frequency of circulating CD4<sup>+</sup>T<sub>EM</sub> (B), CD4<sup>+</sup>CD25<sup>+</sup> (C) and CD4<sup>+</sup>CD44<sup>hi</sup> (D) subsets presented as function of the mean of day rejection. **E-G)** Frequency of CD4<sup>+</sup>CD44<sup>hi</sup> subsets compared to plasma cholesterol levels (mg/dL) in draining (E), not draining (F) lymph nodes and spleen (G). N=4 per group. Statistical analysis was performed with two-way Anova. Data are reported as mean ± SEM; \*p<0,05 vs WT BM to WT, ° vs KO BM to WT, # vs WT BM to KO.

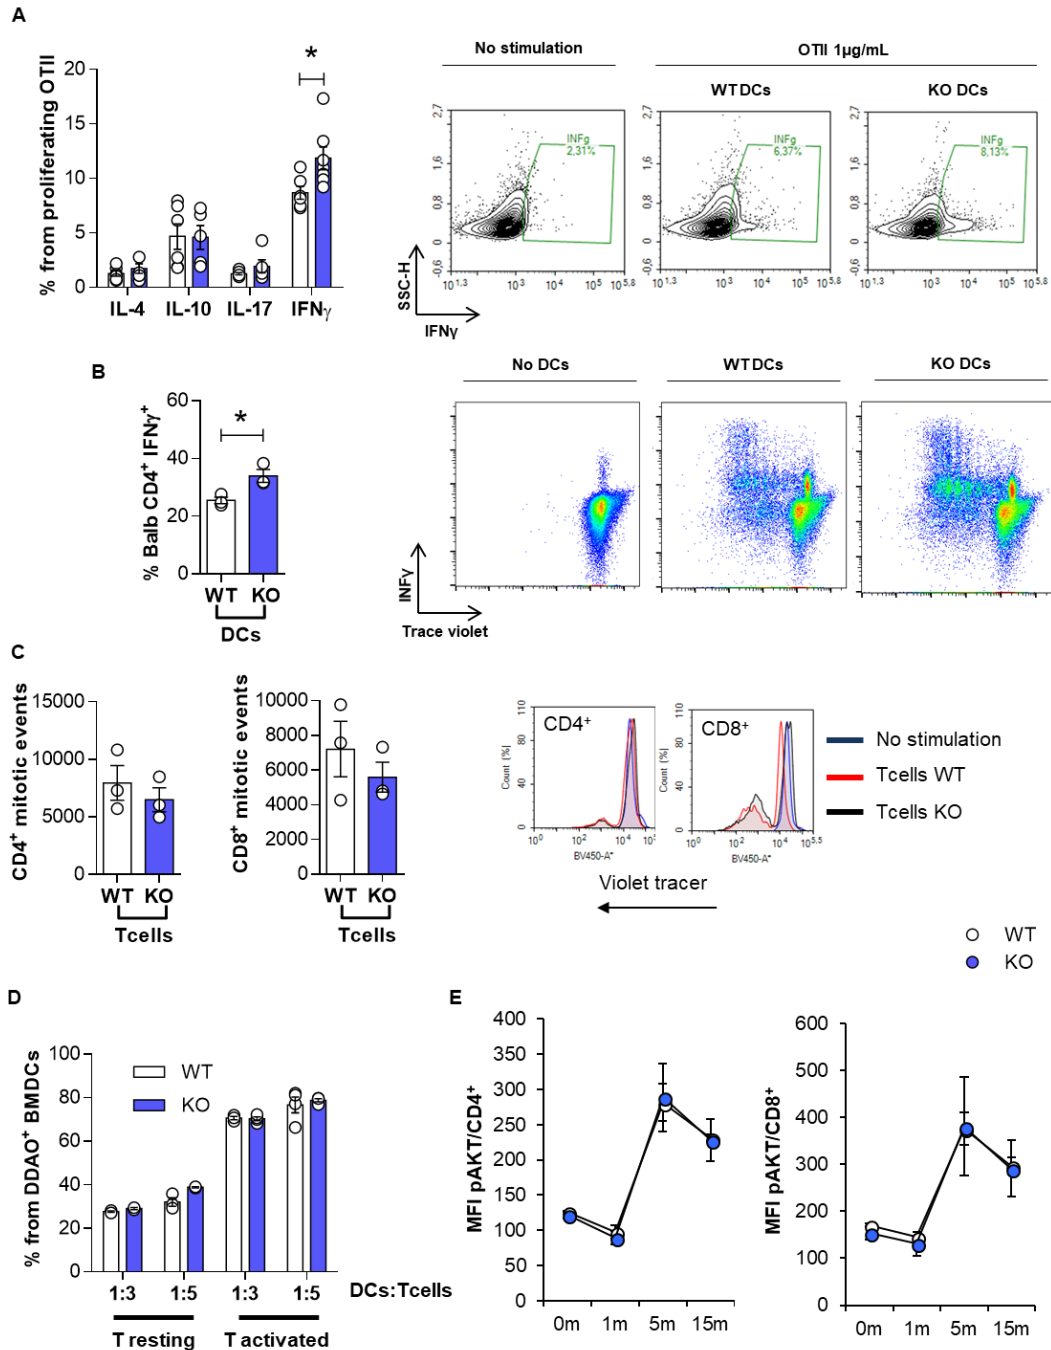

Supplementary Figure 5. T cell activation is not affected by apoE deficiency

**A**) Cytokine production (IL-4, IL-10, IL-17, IFN $\gamma$ ) by transgenic OT-II CD4<sup>+</sup> T cells co-cultured with WT or apoE KO BMDCs pulsed with OT-II peptide (10  $\mu$ g/mL) for four days and re-challenged with OT-II peptide (1  $\mu$ g/mL) for 4 hours; representative dot plots are shown. **B**) IFN $\gamma$  production from BALB/c CD4<sup>+</sup> T cells co-cultured with WT or apoE KO spleen-derived DCs for five days;

representative dot plots are shown. **C)** Proliferation of CD4<sup>+</sup> and CD8<sup>+</sup> T cells isolated from WT and ApoE KO mice pulsed with allogenic BALB/c spleen-derived DCs for five days; representative histograms are shown. **D)** Conjugates between allogenic BALB/c BMDCs and resting or activated lymphocytes isolated from C57BL/6 WT and apoE KO analyzed by flow cytometry. **E)** Phosphorylation of AKT detected with flow cytometry in CD4<sup>+</sup> and CD8<sup>+</sup> T cells after *in vitro* anti-CD3/28 stimulation. N=3 (B-D in triplicate), N=6 (A) per group. Statistical analysis was performed with unpaired Ttest (A-C) and two-way Anova (D-E). Data are reported as mean ± SEM; \*p<0.05.



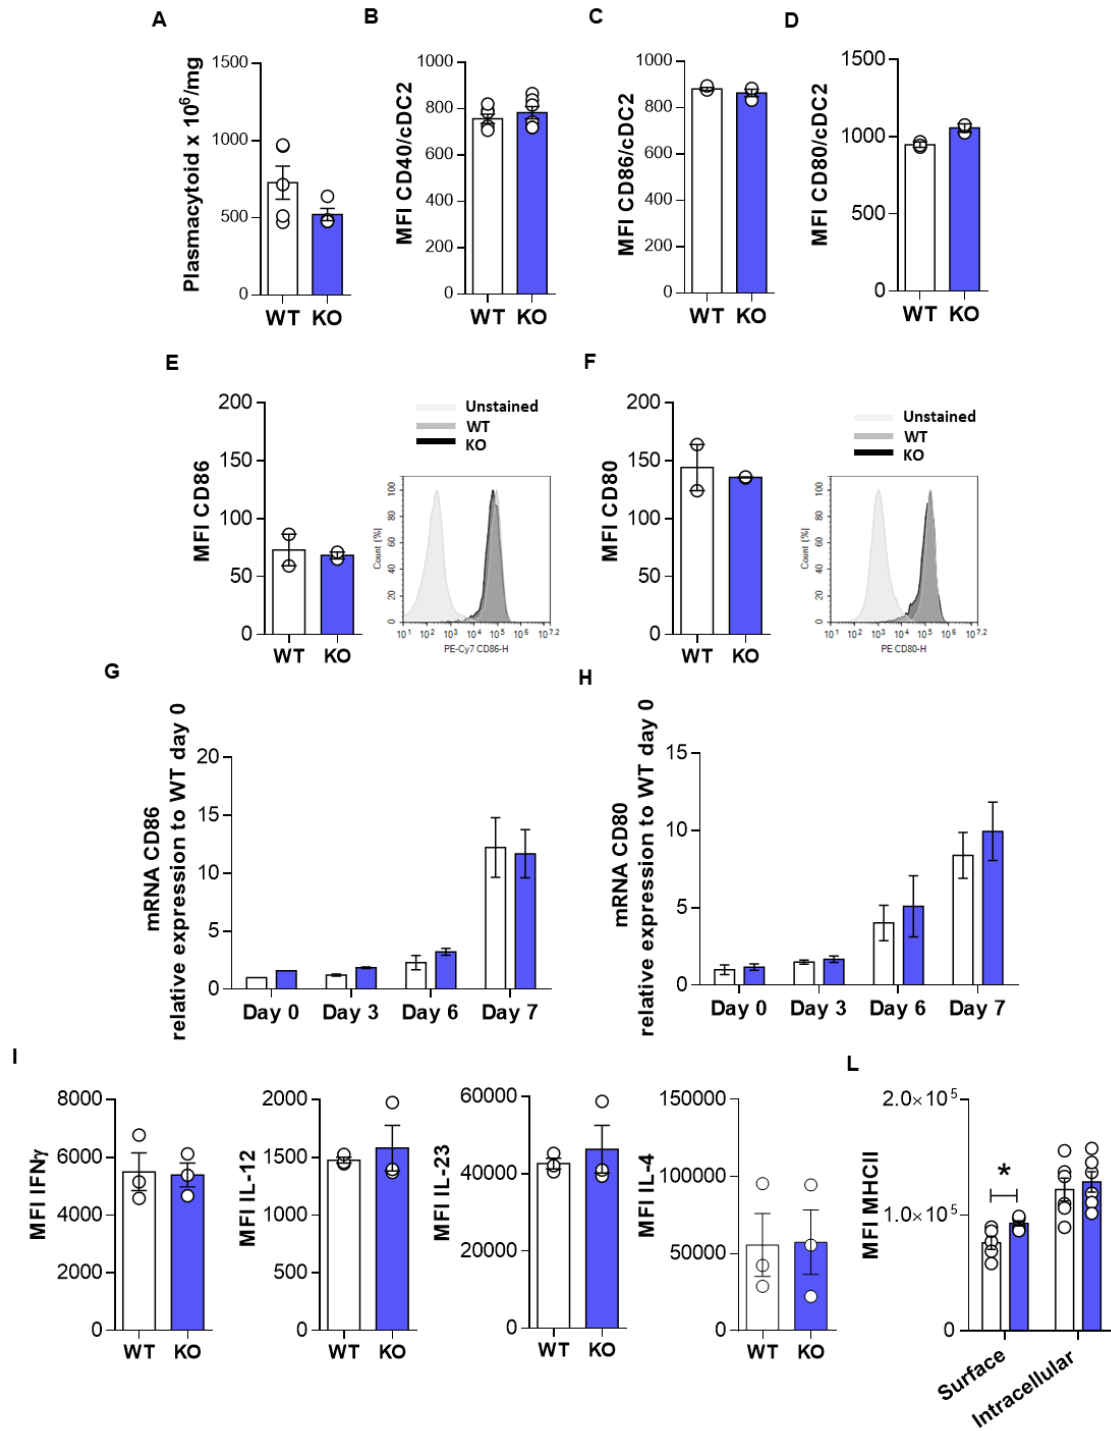

Supplementary Figure 6. Immunophenotyping of spleen-derived DCs and BMDCs

**A)** Number of plasmacytoid (CD11c<sup>+</sup>MHCII<sup>+</sup>B220<sup>+</sup>) DCs corrected for spleen weight of WT or apoE KO mice. **B-D)** Mean fluorescence intensity (MFI) of cDC2 from WT and apoE KO mice for CD40 (B), CD86 (C) and CD80 (D). **E-F)** protein expression of CD86 (E) and CD80 (F) in BMDCs from WT and

apoE KO mice after stimulation with LPS (10 ng/mL) for 18h analysed by flow cytometry; representative histogram are shown. **G-H)** mRNA expression of CD86 (G) and CD80 (H) in BMDCs of WT and apoE KO mice before differentiation (day 0) and at 3, 6 and 7 days of differentiation and maturation (stimulation with LPS (10ng/mL) for 18h). **I)** mean fluorescence intensity (MFI) of IFN $\gamma$ , IL-12, IL-23 and IL-10 in BMDCs after stimulation with LPS (10ng/mL) for 4h analysed by flow cytometry. **L)** mean fluorescence intensity (MFI) of MHCII in cDC2 from WT or apoE KO mice analysed as surface and intracellular expression by flow cytometry. N=2-5 per group. Statistical analysis was performed with unpaired Ttest. Data are reported as mean  $\pm$  SEM; \*p<0,05.

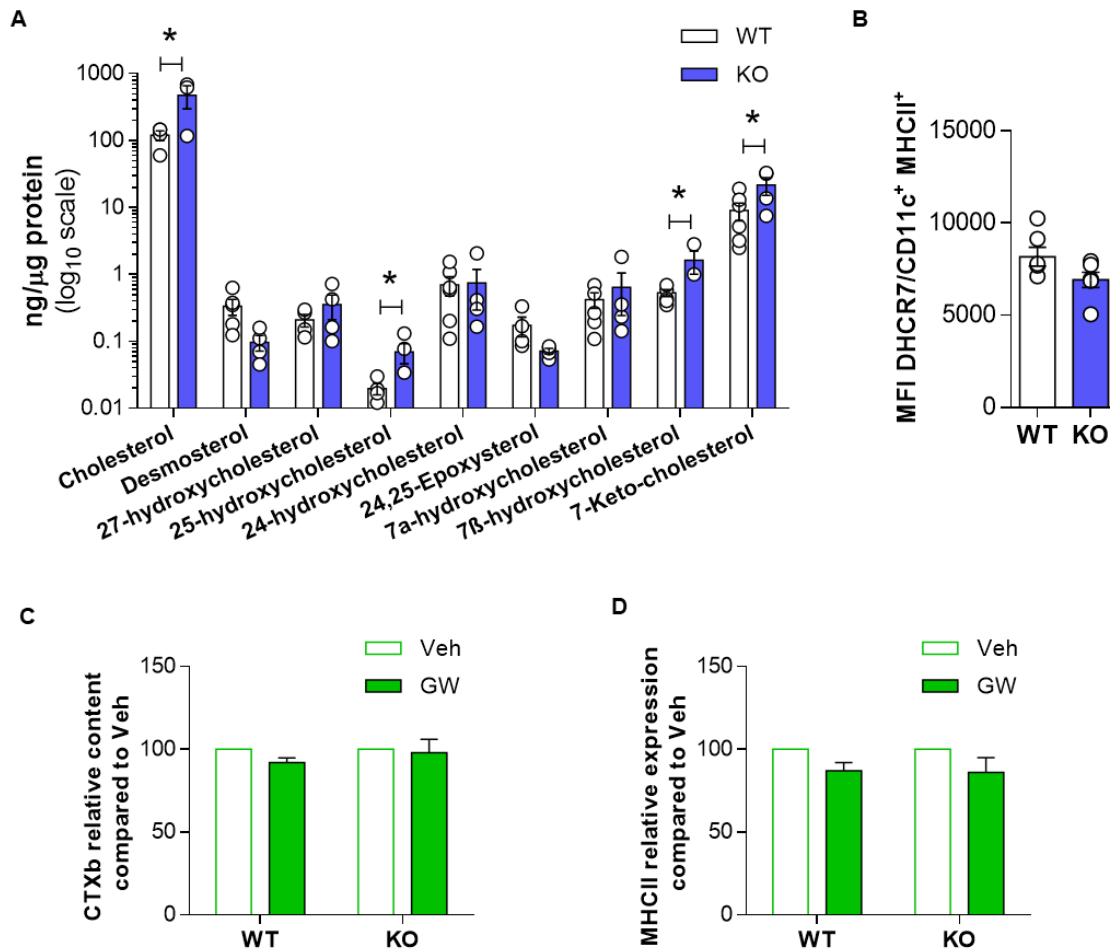

Supplementary Figure 7. Sterols and oxysterols profile of WT and apoE KO DCs

**A)** Determination (ng/μg) of sterols and oxysterols by gas chromatography-mass spectrometry of spleen-derived DCs. **B)** Mean fluorescence intensity (MFI) of DHCR7 in DCs of WT and apoE KO determined by facs analysis. **C-D)** lipid rafts content (CTXb staining, C) and MHCII expression (D) in mature BMDCs treated with the LXR agonist GW3965 (1 μM). n=4-6 per group. Statistical analysis was performed with unpaired Ttest. Data are reported as mean ± SEM; \*p<0,05.

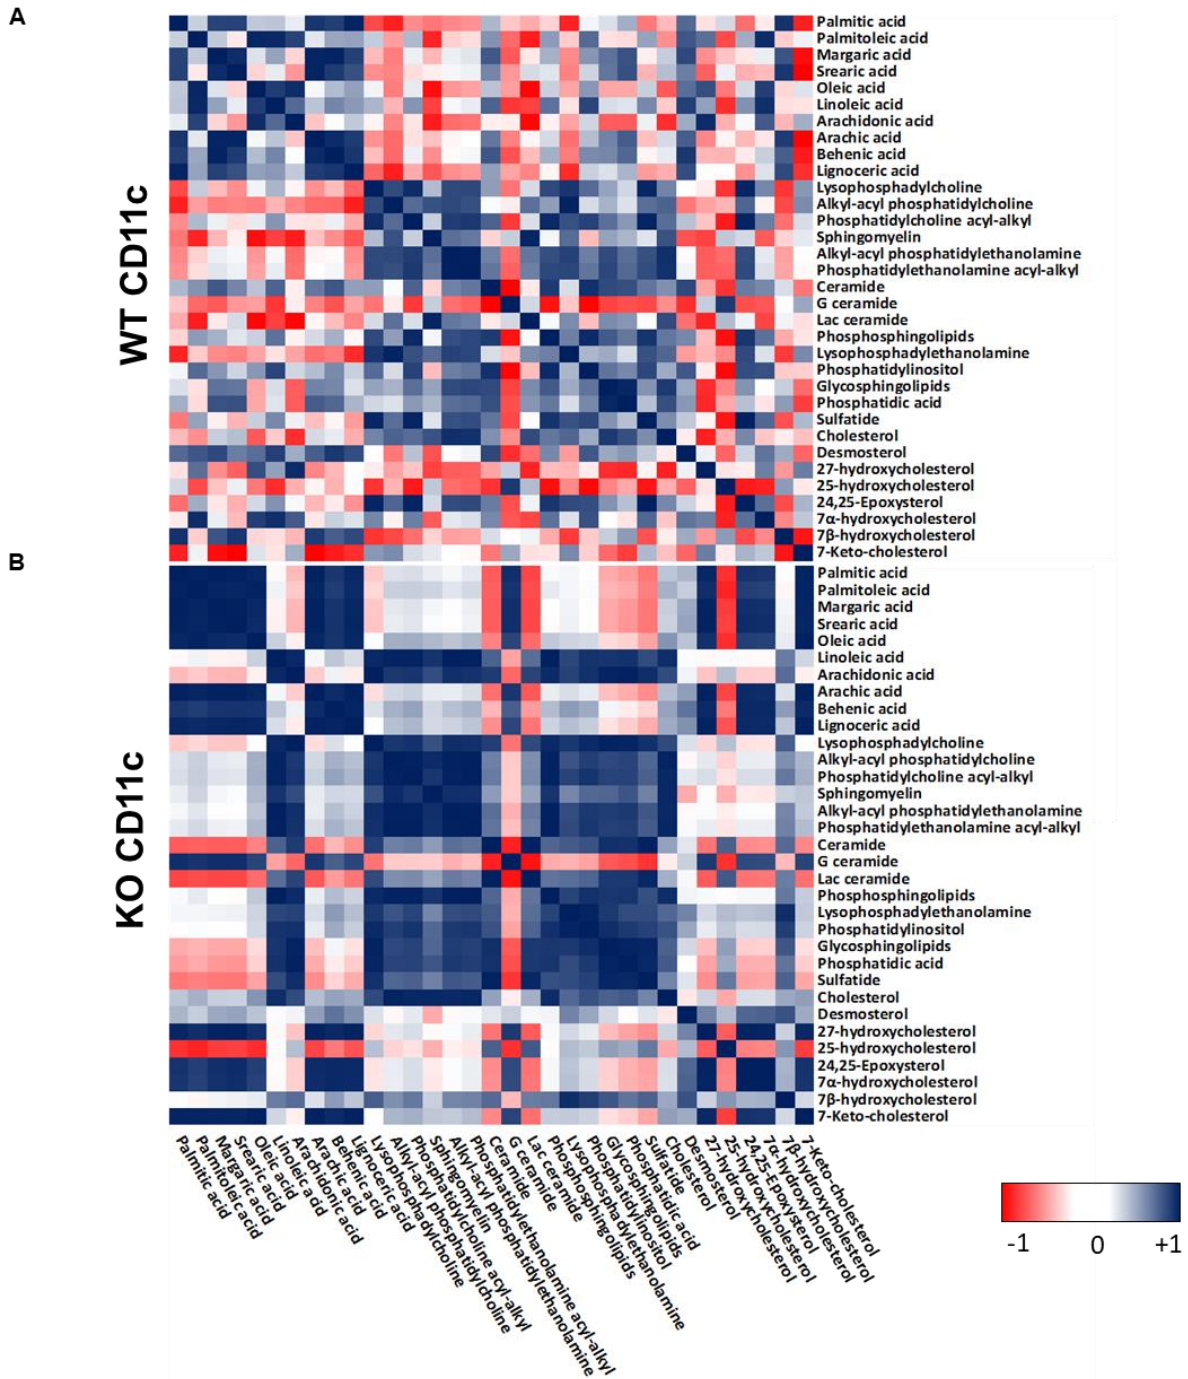

Supplementary Figure 8. Dependence between lipids of DCs of WT or apoE KO mice

A-B) Correlation matrix was used to investigate the dependence between phospholipids, fatty acids, sterols and oxysterols within CD11c<sup>+</sup> isolated from the spleen of WT or apoE KO mice. Lipids were determined by gas chromatography-mass spectrometry. N=4 per group.

A

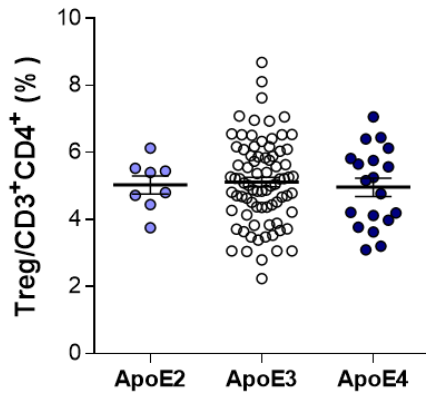

B

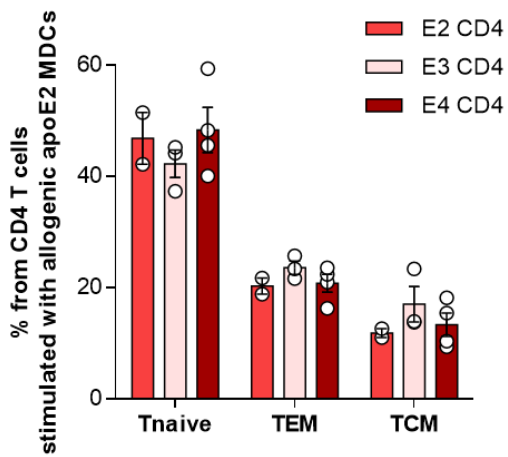

C

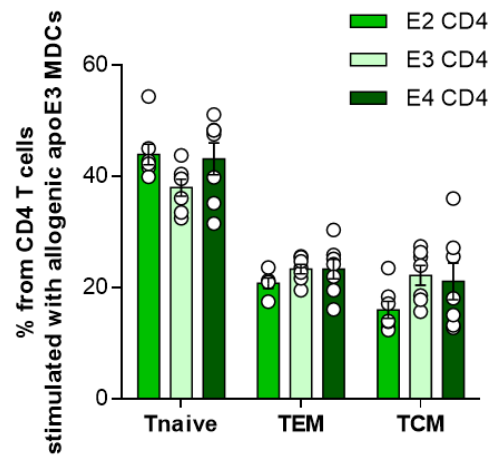

Supplementary Figure 9. Levels of circulating Treg cells in human carriers of different apoE isoforms and isoform-dependent MDCs reactivity tested with MLR assay

A) Levels of circulating Treg cells ( $CD4^+ CD25^{hi} CD127^{lo}$ ) in human carriers of apoE isoforms. B-C) Polarization of  $CD4^+$  T<sub>naive</sub> cells from carriers of apoE2, apoE3 or apoE4 isoform with allogenic MDCs from apoE2 (B) and apoE3 (C) carriers. N=2-5 per group (B-C). Statistical analysis was performed with two-way Anova. Data are reported as mean  $\pm$  SEM.

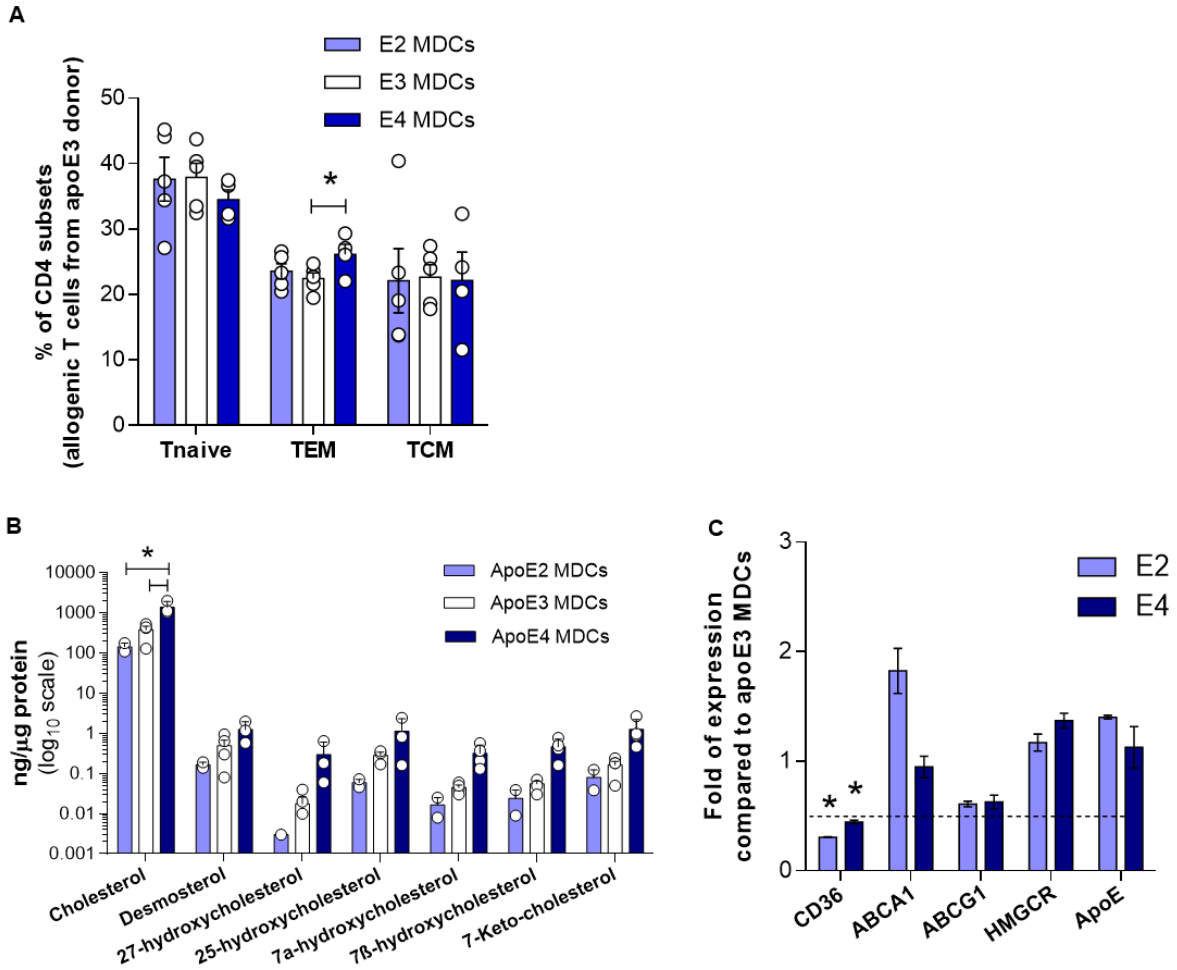

Supplementary Figure 10. ApoE isoform-dependent T cell polarization and MDCs reactivity tested with MLR assay

**A)** Polarization of CD4<sup>+</sup> T<sub>naive</sub> cells from a carrier of apoE3 isoform with allogeneic MDCs from apoE2, apoE3 and apoE4 carriers. **B)** Determination (ng/μg) of sterols and oxysterols by gas chromatography-mass spectrometry of MDCs from apoE2, apoE3 and apoE4 carriers. **C)** Expression of CD36, ABCA1, ABCG1, HMGCR and ApoE mRNA by MDCs from apoE2 and apoE4 carriers compared to apoE3 carriers. N=2-4 per group. Statistical analysis was performed with two-way Anova. Data are reported as mean ± SEM; \*p<0.05.

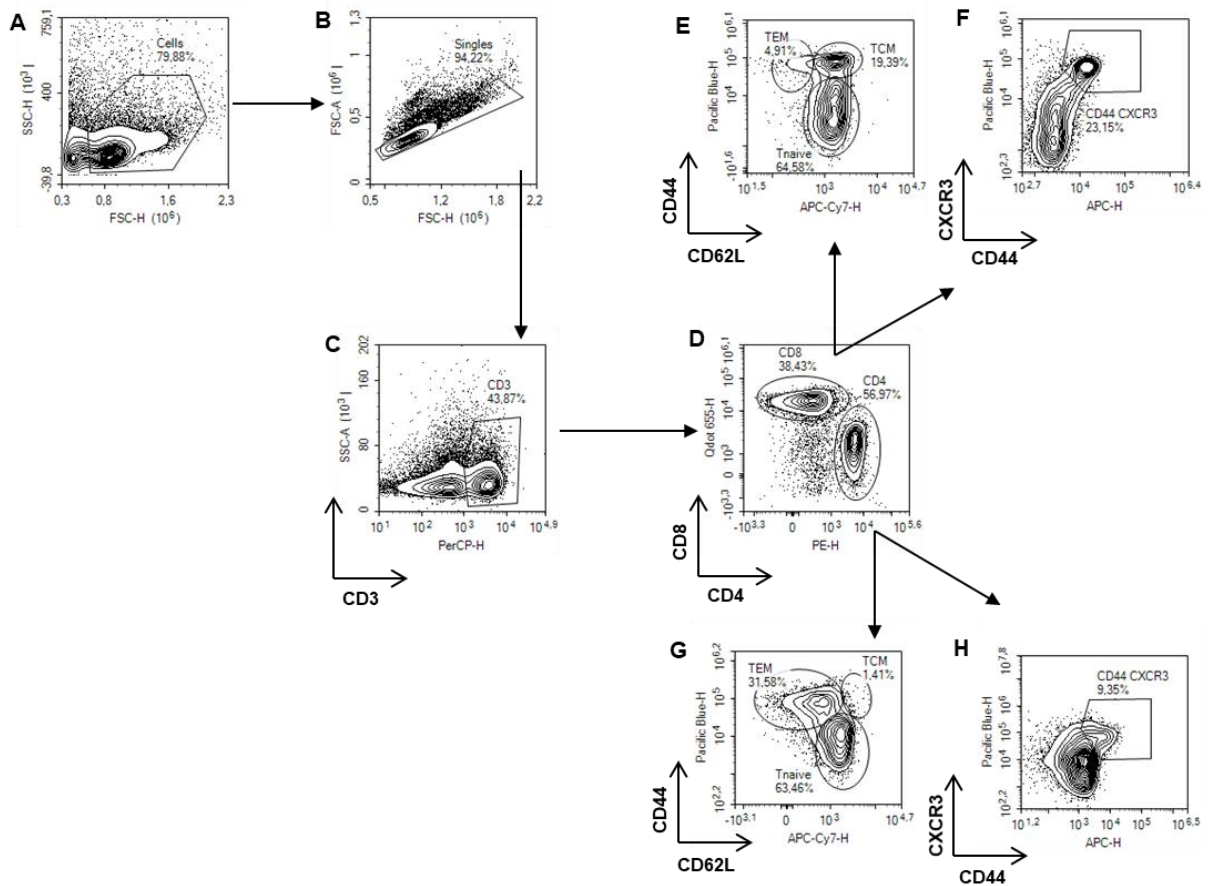

Supplementary Figure 11. Gating strategy for murine T cell subset analysis in lymph nodes and spleen

A) Live cells were gated based on dimension (FSC-H vs SSC-H) and single cells discriminated (B). T cells were selected on CD3 positivity (C) and further discriminated in CD4<sup>+</sup> and CD8<sup>+</sup> T cells (D). CD4<sup>+</sup> and CD8<sup>+</sup> T subsets were identified in T<sub>naive</sub> (CD62L<sup>+</sup> CD44<sup>-</sup>), T central memory (T<sub>CM</sub>, CD62L<sup>+</sup> CD44<sup>+</sup>) and T effector memory (T<sub>EM</sub>, CD62L<sup>-</sup> CD44<sup>+</sup>) (E, G) and activated T cell (CD44<sup>hi</sup> CXCR3<sup>+</sup>) (F, H).

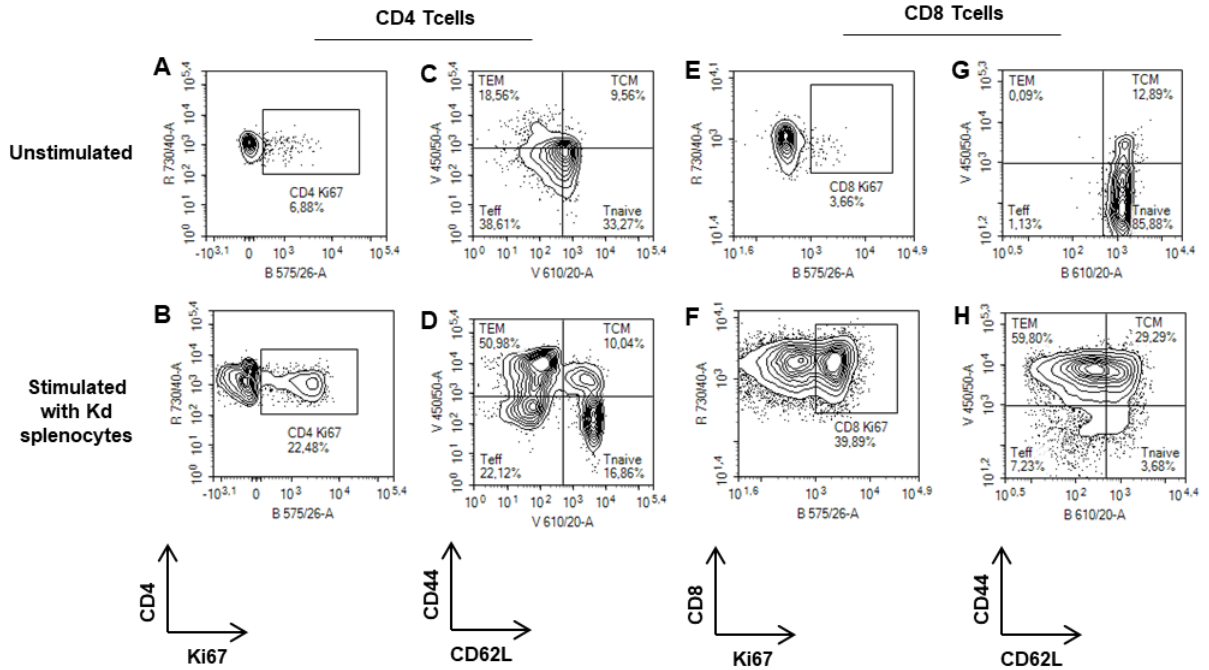

Supplementary Figure 12. Gating strategy for analysis of T cells from grafted WT and apoE KO BMT mice after challenge with  $K^d$  splenocytes

**A-B)** Proliferating  $CD4^+$  T cells were identified by Ki67 staining; **(C-D)**  $CD4$  polarization was analyzed with CD44 and CD62L staining and identified as  $T_{naive}$  ( $CD62L^+ CD44^-$ ),  $T_{CM}$  ( $CD62L^+ CD44^+$ ) and  $T_{EM}$  ( $CD62L^- CD44^+$ ); **(E-F)** Proliferating  $CD8^+$  T cells were identified by Ki67 staining; **(G-H)**  $CD8$  polarization was analyzed with CD44 and CD62L staining and identified as  $T_{naive}$  ( $CD62L^+ CD44^-$ ),  $T_{CM}$  ( $CD62L^+ CD44^+$ ) and  $T_{EM}$  ( $CD62L^- CD44^+$ ).



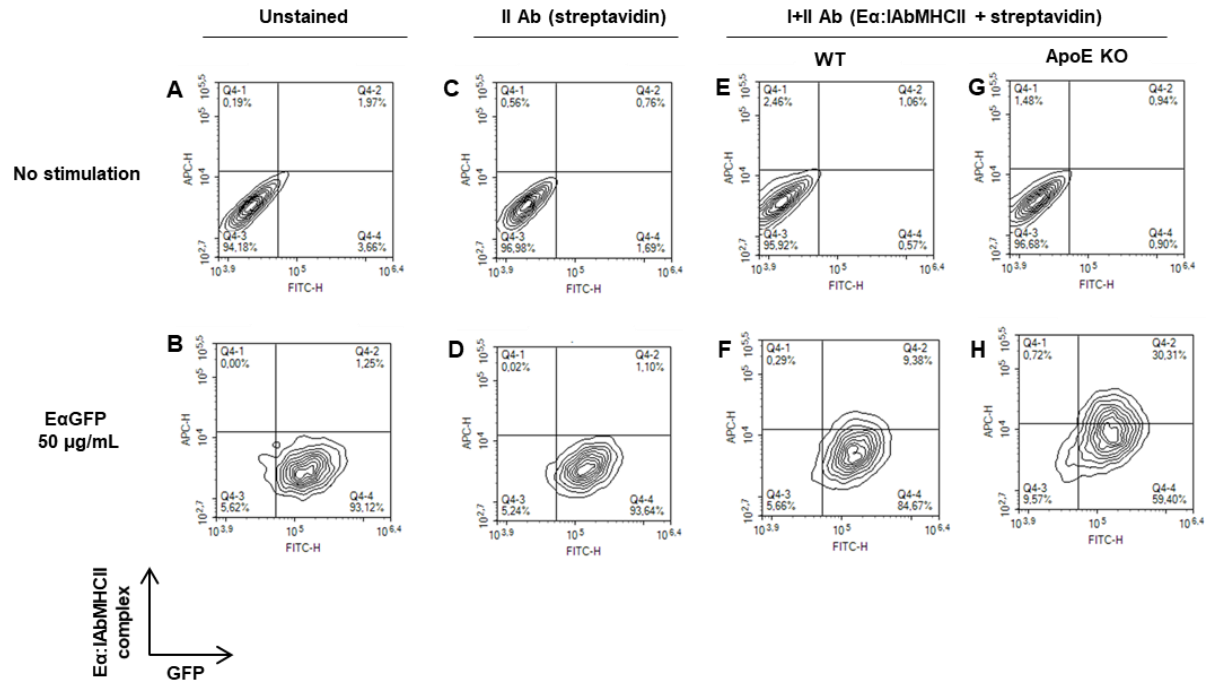

Supplementary Figure 13. Control plots for EαGFP uptake and presentation in BMDCs from WT and apoE KO mice.

BMDCs were treated or not with EαGFP 50 μg/mL for 4 hours; gating of BMDCs unstained (A-B), stained with the secondary antibody conjugated with streptavidin and the APC fluorochrome (C-D) and with the primary antibody against the Eα:IAbMHCII complex and streptavidin (E-H) are shown.

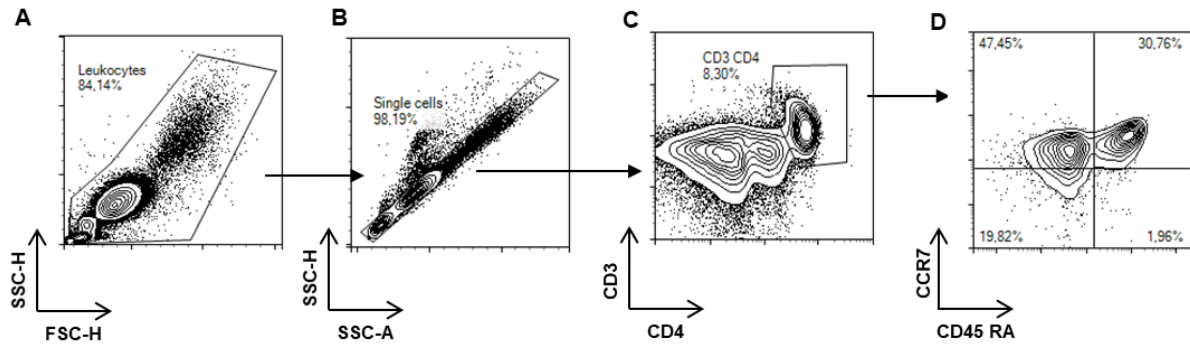

**Supplementary Figure 14. Gating strategy for the analysis of T cells from human blood**

A) Circulating leukocytes were gated based on dimension (FSC-H vs SSC-H) and single cells discriminated (B). CD4<sup>+</sup> T cells were selected depending on CD3 and CD4 positivity (C) and further discriminated in T<sub>naive</sub> (CD45RA<sup>+</sup> CCR7<sup>+</sup>), T central memory (T<sub>CM</sub>, CD45RA<sup>-</sup> CCR7<sup>+</sup>) and T effector memory (T<sub>EM</sub>, CD45RA<sup>-</sup> CCR7<sup>-</sup>) (D).

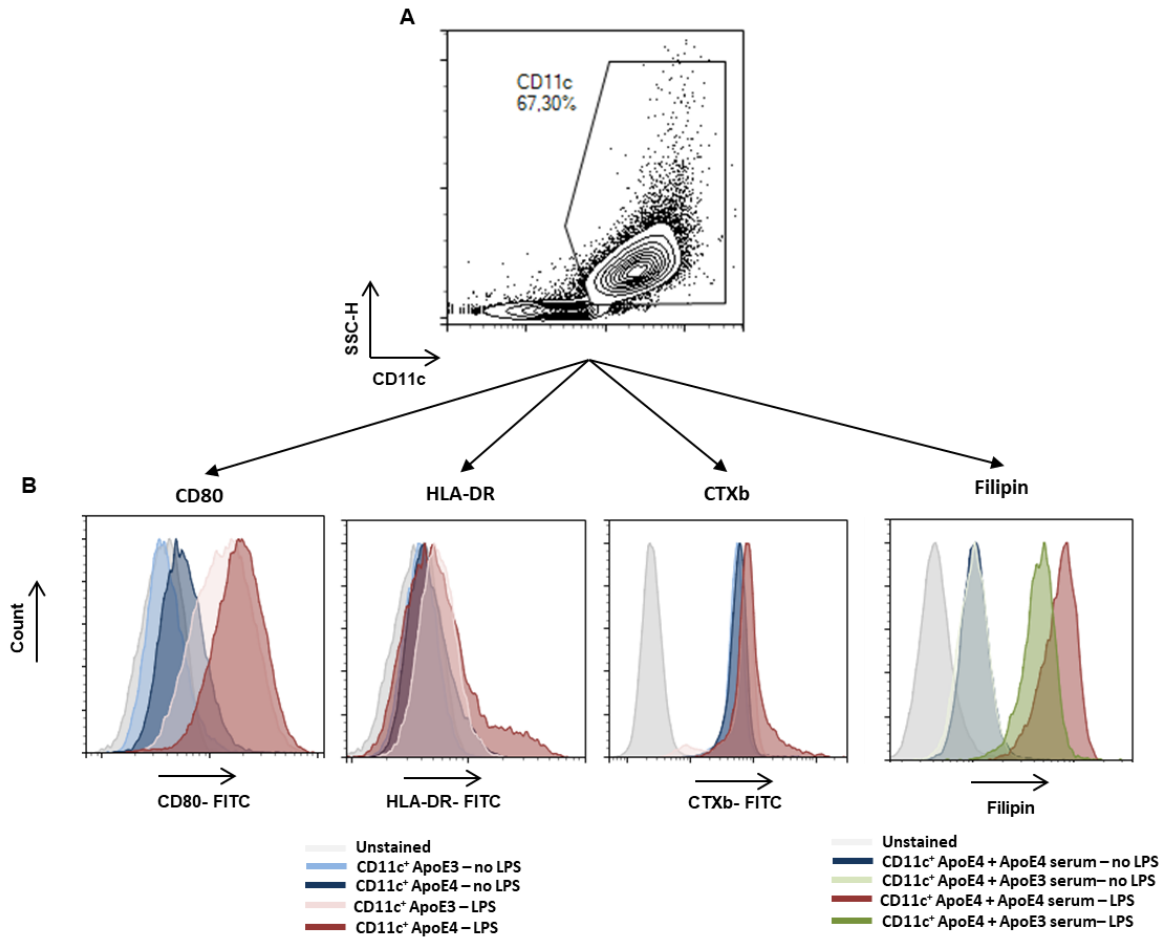

Supplementary Figure 15. Representative histograms, gating strategy and FMO controls of MDCs characterization

A) MDCs were discriminated based on CD11c positivity and the Median Fluorescence Intensity (MFI) of CD80, HLA-DR, CTXb (cholera toxin subunit B) and filipin was evaluated (B).

**Supplementary Table 1.** Clinical Characteristics, Biological Parameters and Therapies of Carriers of apoE isoforms From the General Population (PLIC Study)

|                                        | ApoE 2/3 (n=14) | ApoE 3/3 (n=121) | ApoE 3/4 (n=23) | pvalue                   |
|----------------------------------------|-----------------|------------------|-----------------|--------------------------|
| Age (years)                            | 53 (14)         | 56 (13)          | 51 (13)         | 0.213                    |
| Gender (n, male)                       | 7               | 58               | 10              | 0.908                    |
| BMI (Kg/m <sup>2</sup> )               | 25.40 (3.44)    | 26.17 (3.75)     | 27.05 (3.76)    | 0.513                    |
| Waist/hip circumferences ratio         | 0.856 (0.074)   | 0.879 (0.094)    | 0.878 (0.084)   | 0.605                    |
| Systolic blood pressure (mmHg)         | 133 (8)         | 124 (17)         | 122 (15)        | 0.163                    |
| Diastolic blood pressure (mmHg)        | 78 (5)          | 76 (9)           | 72 (9)          | 0.124                    |
| Diagnosis of hyperthension (n, yes)    | 5               | 38               | 4               | 0.295                    |
| Anti-hyperensive (n, yes)              | 4               | 36               | 3               | 0.244                    |
| Fasting glucose levels (mg/dL)         | 102.71 (24.96)  | 101.30 (21.69)   | 100.39 (19.15)  | 0.290                    |
| Diagnosis of type 2 Diabetes (n, yes)  | 0               | 11               | 2               | 0.541                    |
| Glucose lowering drugs (n, yes)        | 0               | 3                | 1               | 0.727                    |
| Total cholestol (mg/dL)                | 196.14 (35.81)  | 221.00 (40.51)   | 225.82 (40.24)  | 0.065                    |
| HDL-C (mg/dL)                          | 62.50 (10.95)   | 56.31 (13.14)    | 56.60 (11.75)   | 0.077                    |
| Triglycerides (mg/dL)                  | 85.35 (23.12)   | 103.55 (58.23)   | 100.60 (45.80)  | 0.623                    |
| LDL-C (Friedewald formula)             | 116.60 (38.59)  | 144.31 (35.26)   | 153.10 (40.15)  | <b>0.043</b><br>(* , **) |
| ApoB (mg/dL)                           | 101.79 (18.21)  | 114.11 (25.59)   | 117.87 (32.56)  | 0.186                    |
| Lipid lowering drugs (n, yes)          | 2               | 21               | 2               | 0.591                    |
| Alanine Amino-Transferase (ALT, U/l)   | 24.78 (7.80)    | 26.67 (13.10)    | 23.34 (12.62)   | 0.425                    |
| Aspartate Amino-Transferase (AST, U/l) | 23.50 (8.53)    | 22.59 (8.26)     | 20.17 (5.13)    | 0.334                    |
| Glutamyl Transferase (GGT, U/l)        | 36.92 (10.56)   | 35.47 (3.25)     | 25.91 (2.60)    | 0.370                    |

**Table legend.** Data are presented as mean±standard deviation. BMI indicates body mass index; HDL-C, high-density lipoprotein cholesterol; LDL-C, low-density lipoprotein cholesterol.

\* E2 vs E3; \*\* E2 vs E4

**Supplementary Table 2.** List of antibodies used in the paper.

| ANTIBODIES                                              | SOURCE         | IDENTIFIER                         |
|---------------------------------------------------------|----------------|------------------------------------|
| Mouse monoclonal anti-CD3e PerCP Cy5.5                  | eBioscience    | Cat#45-0031<br>RRID:AB_1107000     |
| Mouse monoclonal anti-CD4 PECF594                       | BD Biosciences | Cat#562285<br>RRID:AB_11154410     |
| Mouse monoclonal anti-CD4 FITC                          | eBioscience    | Cat#11-0042-86<br>RRID:AB_464898   |
| Mouse monoclonal anti-CD8 eVolve™ 655                   | eBioscience    | Cat#86-0081<br>RRID:AB_2574783     |
| Mouse monoclonal anti-CD8a FITC                         | eBioscience    | Cat#11-0081<br>RRID:AB_464916      |
| Mouse monoclonal anti-CD8a PerCP Cy 5.5                 | eBioscience    | Cat#:45-0081-82<br>RRID:AB_1107004 |
| Mouse monoclonal anti-CD44 eFluor® 450                  | eBioscience    | Cat#48-0441<br>RRID:AB_1272246     |
| Mouse monoclonal anti-CD62L APC-eFluor® 780             | eBioscience    | Cat#47-0621<br>RRID:AB_1603256     |
| Mouse monoclonal anti-CD25 PE/Cy7                       | eBioscience    | Cat#25-0251-82<br>RRID:AB_469608   |
| Mouse monoclonal anti-CD183 (CXCR3) APC                 | eBioscience    | Cat#17-1831-80<br>RRID:AB_1210792  |
| Mouse/Rat monoclonal anti-Ki-67 PE                      | eBioscience    | Cat#12-5698-80<br>RRID:AB_11149672 |
| Mouse monoclonal anti-MHC Class II (I-A/I-E) APC        | eBioscience    | Cat# 17-5321-81<br>RRID:AB_469454  |
| Mouse monoclonal anti-MHC Class II (I-A/I-E) eFluor 450 | eBioscience    | Cat#48-5321-82<br>RRID:AB_1272204  |
| Mouse monoclonal anti-CD11c BV605                       | BD Biosciences | Cat#563057                         |
| Mouse monoclonal anti-CD11c eFluor660                   | eBioscience    | Cat#50-0114<br>RRID:AB_11151507    |
| Mouse monoclonal anti-CD45R/B220 PerCP                  | eBioscience    | Cat#561086<br>RRID:AB_2034009      |

|                                                       |                           |                                    |
|-------------------------------------------------------|---------------------------|------------------------------------|
| Mouse monoclonal anti-CD11b APC-eFluor® 780           | eBioscience               | Cat#47-0112<br>RRID:AB_1603193     |
| Mouse monoclonal anti-CD40 PE/Cy7                     | Biolegend                 | Cat#124621<br>RRID:AB_10933422     |
| Mouse monoclonal anti-CD86 PE                         | eBioscience               | Cat#12-0862-82<br>RRID:AB_465768   |
| Mouse monoclonal anti-CD80 PE                         | eBioscience               | Cat#12-0801-82<br>RRID:AB_465752   |
| Mouse anti-Ea 52-68 peptide, biotin conjugated        | eBioscience               | Cat#13-5741-81<br>RRID:AB_657822   |
| Streptavidin APC                                      | eBioscience               | Cat#17-4317-82                     |
| Mouse CD3 Functional Grade Purified                   | eBioscience               | Cat#16-0032-86<br>RRID:AB_468853   |
| Mouse CD28 Functional Grade Purified                  | eBioscience               | Cat#16-0281-81<br>RRID:AB_468920   |
| Phospho-Akt (Ser473) Antibody                         | Cell signaling Technology | Cat#9271<br>RRID:AB_329825         |
| Rabbit Polyclonal IgG (H+L) Alexa Fluor647            | Molecular Probes          | Cat#A31573<br>RRID:AB_2536183      |
| Mouse CD8 depletion monoclonal antibody, clone 53-6.7 | eBioscience               | Cat#14-0081-82<br>RRID:AB_467087   |
| Anti-Apolipoprotein E antibody                        | abcam                     | Cat#ab183597                       |
| Goat anti-rabbit IgG H&L (Alexa Fluor® 488)           | abcam                     | Cat#ab150077<br>RRID:AB_2630356    |
| Mouse monoclonal anti-IFN $\gamma$ AlexaFluor647      | BD Biosciences            | Cat# 557735<br>RRID:AB_396843      |
| Human monoclonal anti-CD4 APC                         | BD Biosciences            | Cat#555349<br>RRID:AB_398593       |
| Human monoclonal anti-CD25 PerCP Cyanine 5.5          | eBioscience               | Cat#45-0259-41<br>RRID:AB_10717820 |
| Human monoclonal anti-CD127 PE                        | eBioscience               | Cat#12-1278-42<br>RRID:AB_10717663 |

|                                       |                |                                 |
|---------------------------------------|----------------|---------------------------------|
| Human monoclonal anti-CD45RA FITC     | BD Biosciences | Cat#555488<br>RRID:AB_395879    |
| Human monoclonal anti-CD197 (CCR7) PE | BD Biosciences | Cat#552176<br>RRID:AB_394354    |
| Human monoclonal anti-CD11c APC       | BD Biosciences | Cat#340544<br>RRID:AB_400520    |
| Human monoclonal anti-HLA-DR FITC     | BD Biosciences | Cat#347363<br>RRID:AB_400291    |
| Human monoclonal anti-CD80 FITC       | BD Biosciences | Cat# 560926<br>RRID:AB_10565975 |

**Supplementary Table 3.** List of mRNA primers used in the paper.

| TARGET           | FW                                   | REV                              |
|------------------|--------------------------------------|----------------------------------|
| mRPL             | 5'- GCGCCTCAAGGTGTTGGAT - 3'         | 5'- GAGCAGCAGGGACCACCAT - 3'     |
| mCD36            | 5'- TGGGAGTTGGCGAGAAAACC-3'          | 5'- CAGGACTGCACCAATAACAGC -3'    |
| mLDLR            | 5'- GTGTGACCGTGAACATGACTGC -3'       | 5'- CACTCCCCACTGTGACACTTGA -3'   |
| mABCA1           | 5'- GGTTTGGAGATGGTTATACAATAGTTGT -3' | 5'- TTCCCGGAAACGCAA -3'          |
| mABCG1           | 5'- TTCATCGTCCTGGGCATCTT -3'         | 5'- CGGATTTTGTATCTGAGGACGAA-3'   |
| mHMGC $\alpha$ R | 5'- TGTGGTTTGTGAAGCCGTCAT -3'        | 5'- TCAACCATAGCTTCCGTAGTTGTC -3' |
| mDHCR24          | 5'- AGAACTACCTGAAGACAAACCG -3'       | 5'- GAAGAGGTAGCGGAAGATGG -3'     |
| h $\beta$ -actin | 5'- CTGGCTGCTGACCCGAGG -3'           | 5'- GAAGGTCTCAAACATGATCTGGGT-3'  |
| hApoE            | 5'- TGGCTACCAACCCCATCATC -3'         | 5'- GCAGGACAGGAGAAGGATACTCA -3'  |
| hCD36            | 5'- TGGGAGTTGGCGAGAAAACC -3'         | 5'- CAGGACTGCACCAATAACAGC -3'    |
| hLDLR            | 5'- GTGTGACCGTGAACATGACTGC -3'       | 5'- CACTCCCCACTGTGACACTTGA -3'   |
| hHMGC $\alpha$ R | 5'- TGTGGTTTGTGAAGCCGTCAT -3'        | 5'- TCAACCATAGCTTCCGTAGTTGTC -3' |
| hABCA1           | 5'- GGTTTGGAGATGGTTATACAATAGTTGT -3' | 5'- TTCCCGGAAACGCAAGTC -3'       |
| hABCG1           | 5'-TTCATCGTCCTGGGCATCTT-3'           | 5'-CGGATTTTGTATCTGAGGACGAA-3'    |
| hTNF $\alpha$    | 5'- GCCCCAGAGGGAAGAGTTCCC -3'        | 5'- CAGCTCCACGCCATTGGCCA -3'     |
| hIL-6            | 5'- TCCACAAGCGCCTTCGGTCC-3'          | 5'- TGTCTGTGTGGGGCGGCTACA -3'    |
| hIL-10           | 5'- GTGATGCCCCAAGCTGAGA -3'          | 5'- TCCCCAGGGAGTTCACA -3'        |
| hIL-1 $\beta$    | 5'- GATGAAGTGCTCCTTCCAGGACCT -3'     | 5'- TGCTGTGAGTCCCGGAGCGT -3'     |
